# Supplementary material for: Suitability and safety of L-5-methyltetrahydrofolate as a folate source in infant formula: A randomized-controlled trial
Source: PubMed Central journal article supplement (PMC6699731; doi:10.1371/journal.pone.0216790), 2019-08-19
Supplement: pone.0216790.s003.pdf [file pone.0216790.s003.pdf]

**S1 Table:** Formulation of infant formula powder for intervention and control group

|                                        | Unit | Per 100 g | Per 100 kcal <sup>a</sup> | Per 100 ml |
|----------------------------------------|------|-----------|---------------------------|------------|
| Energy                                 | kJ   | 2134      |                           | 277        |
|                                        | Kcal | 510       |                           | 66         |
| Protein                                | g    | 9.6       | 1.9                       | 1.25       |
| Carbohydrates, of which                | g    | 56.1      | 11.1                      | 7.3        |
| Lactose                                | g    | 54.6      | 10.8                      | 7.1        |
| Fat, of which                          | g    | 27.0      | 5.3                       | 3.5        |
| Saturated fatty acids                  | g    | 8.9       | 1.8                       | 1.2        |
| Monosaturated fatty acids              | g    | 12.3      | 2.4                       | 1.6        |
| Polyunsaturated fatty acids, of which  | g    | 5.8       | 1.1                       | 0.7        |
| Linoleic acid (n-6)                    | g    | 5.0       | 0.9                       | 0.6        |
| Linolenic acid (n-3)                   | g    | 0.55      | 0.1                       | 0.07       |
| Arachidonic acid                       | mg   | 95        | 18.2                      | 12         |
| Docosahexaenoic acid                   | mg   | 54        | 10.6                      | 7.0        |
| Dietary fiber (Galactooligosaccharide) | g    | 2.3       | 0.5                       | 0.3        |
| Sodium                                 | g    | 0.15      | 0.03                      | 0.02       |
| Potassium                              | mg   | 535       | 106.1                     | 70         |
| Calcium                                | mg   | 385       | 75.8                      | 50         |
| Phosphorus                             | mg   | 210       | 40.9                      | 27         |
| Chloride                               | mg   | 345       | 68.2                      | 45         |

|                         |    |      |       |      |
|-------------------------|----|------|-------|------|
| Magnesium               | mg | 38   | 7.6   | 5.0  |
| Iron                    | mg | 4.0  | 0.8   | 0.5  |
| Zinc                    | mg | 4.0  | 0.8   | 0.5  |
| Copper                  | µg | 346  | 68.2  | 45   |
| Iodine                  | µg | 115  | 22.7  | 15   |
| Manganese               | µg | 58   | 11.4  | 7.5  |
| Selenium                | µg | 10   | 2.0   | 1.3  |
| Fluoride                | µg | <40  | <7.6  | <5   |
| Vitamin C               | mg | 78   | 15.2  | 10   |
| Vitamin A               | µg | 540  | 106.1 | 70   |
| Vitamin D               | µg | 9.0  | 1.8   | 1.2  |
| Vitamin E               | mg | 6.6  | 1.4   | 0.90 |
| Vitamin B1              | mg | 0.45 | 0.1   | 0.06 |
| Vitamin B2              | mg | 0.80 | 0.2   | 0.10 |
| Vitamin B6              | mg | 0.30 | 0.1   | 0.04 |
| Vitamin B12             | µg | 1.15 | 0.2   | 0.15 |
| Folic acid <sup>p</sup> | µg | 78   | 15.2  | 10   |
| Pantothenic acid        | mg | 3.80 | 0.8   | 0.50 |
| Vitamin K               | µg | 38   | 7.6   | 5.0  |
| Biotin                  | µg | 12   | 2.3   | 1.5  |
| Niacin                  | mg | 3.1  | 0.6   | 0.40 |

---

|         |    |    |      |    |
|---------|----|----|------|----|
| Choline | mg | 85 | 16.7 | 11 |
|---------|----|----|------|----|

---

|          |    |    |     |     |
|----------|----|----|-----|-----|
| Inositol | mg | 30 | 5.9 | 3.9 |
|----------|----|----|-----|-----|

---

<sup>a</sup>The nutrient contents per 100 kcal as listed above were calculated on basis of the nutrient contents as well as the energy content per 100ml ready-made formula; <sup>b</sup>or equimolar amounts of MTHF, respectively; MTHF: L-5-methyltetrahydrofolate
