# Supplementary material for: Suitability and safety of L-5-methyltetrahydrofolate as a folate source in infant formula: A randomized-controlled trial
Source: PubMed Central journal article supplement (PMC6699731; doi:10.1371/journal.pone.0216790), 2019-08-19
Supplement: pone.0216790.s005.pdf [file pone.0216790.s005.pdf]

**S3 Table:** Comparison of parameters of acceptability and tolerance of the intervention formula in the per-protocol population

| <b>Parameter</b>                               | <b>Statistic</b> | <b>DF</b> | <b><i>p</i></b> |
|------------------------------------------------|------------------|-----------|-----------------|
| Crying V1 - Control vs. Intervention           | 0.7674           | 1         | 0.3810          |
| Crying V1 - Control vs. Reference              | 0.0146           | 1         | 0.9039          |
| Crying V1 - Intervention vs. Reference         | 1.0066           | 1         | 0.3157          |
| Crying V2 - Control vs. Intervention           | 2.0226           | 1         | 0.1550          |
| Crying V2 - Control vs. Reference              | 0.0410           | 1         | 0.8395          |
| Crying V2 - Intervention vs. Reference         | 1.6794           | 1         | 0.1950          |
| Crying V3 - Control vs. Intervention           | 0.0379           | 1         | 0.8457          |
| Crying V3 - Control vs. Reference              | 0.3021           | 1         | 0.5825          |
| Crying V3 - Intervention vs. Reference         | 0.5341           | 1         | 0.4649          |
| Crying V4 - Control vs. Intervention           | 2.3534           | 1         | 0.1250          |
| Crying V4 - Control vs. Reference              | 0.9222           | 1         | 0.3369          |
| Crying V4 - Intervention vs. Reference         | 0.6276           | 1         | 0.4282          |
| Sleeping hours V1 - Control vs. Intervention   | 0.6269           | 1         | 0.4285          |
| Sleeping hours V1 - Control vs. Reference      | 0.2571           | 1         | 0.6122          |
| Sleeping hours V1 - Intervention vs. Reference | 0.0663           | 1         | 0.7967          |
| Sleeping hours V2 - Control vs. Intervention   | 0.0524           | 1         | 0.8189          |

|                                                  |        |   |        |
|--------------------------------------------------|--------|---|--------|
| Sleeping hours V2 - Control vs. Reference        | 0.2479 | 1 | 0.6186 |
| Sleeping hours V2 - Intervention vs. Reference   | 0.3566 | 1 | 0.5504 |
| Sleeping hours V3 - Control vs. Intervention     | 0.0013 | 1 | 0.9710 |
| Sleeping hours V3 - Control vs. Reference        | 1.2635 | 1 | 0.2610 |
| Sleeping hours V3 - Intervention vs. Reference   | 1.0164 | 1 | 0.3134 |
| Sleeping hours V4 - Control vs. Intervention     | 0.010  | 1 | 0.9204 |
| Sleeping hours V4 - Control vs. Reference        | 1.2865 | 1 | 0.2567 |
| Sleeping hours V4 - Intervention vs. Reference   | 1.6424 | 1 | 0.2000 |
| Formula Acceptance V1 - Control vs. Intervention | 3.9023 | 1 | 0.0482 |
| Formula Acceptance V2 - Control vs. Intervention | 0.5892 | 1 | 0.4427 |
| Formula Acceptance V3 - Control vs. Intervention | 5.7817 | 1 | 0.0162 |
| Formula Acceptance V4 - Control vs. Intervention | 0.3841 | 1 | 0.5354 |
| Belching V1 - Control vs. Intervention           | 1.0278 | 1 | 0.3107 |
| Belching V1 - Control vs. Reference              | 4.8142 | 1 | 0.0282 |
| Belching V1 - Intervention vs. Reference         | 0.6545 | 1 | 0.4185 |
| Belching V2 - Control vs. Intervention           | 4.0248 | 1 | 0.0448 |
| Belching V2 - Control vs. Reference              | 7.1298 | 1 | 0.0076 |
| Belching V2 - Intervention vs. Reference         | 0.2458 | 1 | 0.6200 |

|                                            |        |   |        |
|--------------------------------------------|--------|---|--------|
| Belching V3 - Control vs. Intervention     | 0.0482 | 1 | 0.8263 |
| Belching V3 - Control vs. Reference        | 2.2853 | 1 | 0.1306 |
| Belching V3 - Intervention vs. Reference   | 2.5332 | 1 | 0.1115 |
| Belching V4 - Control vs. Intervention     | 1.0030 | 1 | 0.3166 |
| Belching V4 - Control vs. Reference        | 0.6205 | 1 | 0.4309 |
| Belching V4 - Intervention vs. Reference   | 3.5709 | 1 | 0.0588 |
| Possetting V1 - Control vs. Intervention   | 0.1552 | 1 | 0.6936 |
| Possetting V1 - Control vs. Reference      | 1.4193 | 1 | 0.2335 |
| Possetting V1 - Intervention vs. Reference | 2.5729 | 1 | 0.1087 |
| Possetting V2 - Control vs. Intervention   | 0.2916 | 1 | 0.5892 |
| Possetting V2 - Control vs. Reference      | 0.1003 | 1 | 0.7514 |
| Possetting V2 - Intervention vs. Reference | 0.0419 | 1 | 0.8378 |
| Possetting V3 - Control vs. Intervention   | 2.1393 | 1 | 0.1436 |
| Possetting V3 - Control vs. Reference      | 0.2372 | 1 | 0.6263 |
| Possetting V3 - Intervention vs. Reference | 3.8285 | 1 | 0.0504 |
| Possetting V4 - Control vs. Intervention   | 0.0495 | 1 | 0.8239 |
| Possetting V4 - Control vs. Reference      | 1.1148 | 1 | 0.2910 |
| Possetting V4 - Intervention vs. Reference | 1.3522 | 1 | 0.2449 |

|                                          |        |   |        |
|------------------------------------------|--------|---|--------|
| Vomiting V1 - Control vs. Intervention   | 0.5007 | 1 | 0.4792 |
| Vomiting V1 - Control vs. Reference      | 0.0088 | 1 | 0.9253 |
| Vomiting V1 - Intervention vs. Reference | 0.3962 | 1 | 0.5291 |
| Vomiting V2 - Control vs. Intervention   | 0.7908 | 1 | 0.3738 |
| Vomiting V2 - Control vs. Reference      | 0.0009 | 1 | 0.9759 |
| Vomiting V2 - Intervention vs. Reference | 0.6951 | 1 | 0.4044 |
| Vomiting V3 - Control vs. Intervention   | 1.5131 | 1 | 0.2187 |
| Vomiting V3 - Control vs. Reference      | 0.6646 | 1 | 0.4150 |
| Vomiting V3 - Intervention vs. Reference | 0.2746 | 1 | 0.6003 |
| Vomiting V4 - Control vs. Intervention   | 0.0184 | 1 | 0.8921 |
| Vomiting V4 - Control vs. Reference      | 0.010  | 1 | 0.9202 |
| Vomiting V4 - Intervention vs. Reference | 0.0019 | 1 | 0.9654 |
| Bloating V1 - Control vs. Intervention   | 0.0399 | 1 | 0.8417 |
| Bloating V1 - Control vs. Reference      | 0.0889 | 1 | 0.7656 |
| Bloating V1 - Intervention vs. Reference | 0.0122 | 1 | 0.9119 |
| Bloating V2 - Control vs. Intervention   | 0.0459 | 1 | 0.8303 |
| Bloating V2 - Control vs. Reference      | 0.1722 | 1 | 0.6781 |
| Bloating V2 - Intervention vs. Reference | 0.0342 | 1 | 0.8533 |

|                                                 |        |   |        |
|-------------------------------------------------|--------|---|--------|
| Bloating V3 - Control vs. Intervention          | 3.7096 | 1 | 0.0541 |
| Bloating V3 - Control vs. Reference             | 1.8304 | 1 | 0.1761 |
| Bloating V3 - Intervention vs. Reference        | 0.7144 | 1 | 0.3980 |
| Bloating V4 - Control vs. Intervention          | 0.0931 | 1 | 0.7603 |
| Bloating V4 - Control vs. Reference             | 0.0463 | 1 | 0.8296 |
| Bloating V4 - Intervention vs. Reference        | 0.0218 | 1 | 0.8827 |
| Bowel movements V1 - Control vs. Intervention   | 0.0485 | 1 | 0.8258 |
| Bowel movements V1 - Control vs. Reference      | 14.976 | 1 | 0.0001 |
| Bowel movements V1 - Intervention vs. Reference | 9.8233 | 1 | 0.0017 |
| Bowel movements V2 - Control vs. Intervention   | 0.5970 | 1 | 0.4397 |
| Bowel movements V2 - Control vs. Reference      | 0.4315 | 1 | 0.5112 |
| Bowel movements V2 - Intervention vs. Reference | 1.7298 | 1 | 0.1884 |
| Bowel movements V3 - Control vs. Intervention   | 0.2707 | 1 | 0.6028 |
| Bowel movements V3 - Control vs. Reference      | 0.5664 | 1 | 0.4517 |
| Bowel movements V3 - Intervention vs. Reference | 1.7547 | 1 | 0.1853 |
| Bowel movements V4 - Control vs. Intervention   | 0.9142 | 1 | 0.3390 |
| Bowel movements V4 - Control vs. Reference      | 0.6627 | 1 | 0.4156 |
| Bowel movements V4 - Intervention vs. Reference | 0.0266 | 1 | 0.8704 |

---

p <0.05 was considered significant, Mann-Whitney-U was used to compare the groups; DF: degrees of freedom
