# Supplementary material for: Suitability and safety of L-5-methyltetrahydrofolate as a folate source in infant formula: A randomized-controlled trial
Source: PubMed Central journal article supplement (PMC6699731; doi:10.1371/journal.pone.0216790), 2019-08-19
Supplement: pone.0216790.s006.pdf [file pone.0216790.s006.pdf]

**S5 Table:** Summary of adverse events by category and group

| <b>Category</b>             | <b>Intervention group</b> | <b>Control group</b> | <b>Reference group</b> |
|-----------------------------|---------------------------|----------------------|------------------------|
| Anaemia                     | 1 (33.3%)                 | 1 (33.3%)            | 1 (33.3%)              |
| Candida infection           | 1 (33.3%)                 | 0 (0.0%)             | 2 (66.6%)              |
| Common cold                 | 4 (16.0%)                 | 10 (40.0%)           | 11 (44.0%)             |
| Ear infection               | 0 (0.0%)                  | 1 (50.0%)            | 1 (50.0%)              |
| Fever                       | 0 (0.0%)                  | 0 (0.0%)             | 1 (100.0%)             |
| Gastrointestinal disorder   | 1 (33.3%)                 | 1 (33.3%)            | 1 (33.3%)              |
| Haematoma                   | 1 (100.0%)                | 0 (0.0%)             | 0 (0.0%)               |
| Hypertonia                  | 1 (25.0%)                 | 3 (75.0%)            | 0 (0.0%)               |
| Overweight                  | 1 (33.3%)                 | 1 (33.3%)            | 1 (33.3%)              |
| Poor weight gain or growth  | 6 (31.6%)                 | 3 (15.8%)            | 10 (52.6%)             |
| Prolongued jaundice         | 1 (33.3%)                 | 0 (0.0%)             | 2 (66.6%)              |
| Rash, eczma or dry skin     | 4 (50.0%)                 | 1 (12.5%)            | 3 (37.5%)              |
| Respiratory tract infection | 3 (37.5%)                 | 2 (25.0%)            | 3 (37.5%)              |
| Torticollis                 | 1 (50.0%)                 | 1 (50.0%)            | 0 (0.0%)               |
| Umbilical granuloma         | 0 (0.0%)                  | 0 (0.0%)             | 1 8100.0%)             |
| Varicella                   | 3 (100.0%)                | 0 (0.0%)             | 0 (0.0%)               |

Note: Denominator is the total number of AE in the respective category; AE: Adverse event
