# Supplementary material for: Suitability and safety of L-5-methyltetrahydrofolate as a folate source in infant formula: A randomized-controlled trial
Source: PubMed Central journal article supplement (PMC6699731; doi:10.1371/journal.pone.0216790), 2019-08-19
Supplement: pone.0216790.s007.pdf [file pone.0216790.s007.pdf]

**S5 Table:** Summary of blood chemistry and hematology parameters

| Parameter                       |                           | Intervention group | Control group    | Reference group  |
|---------------------------------|---------------------------|--------------------|------------------|------------------|
| <b>Serum creatinine</b>         |                           |                    |                  |                  |
| Baseline                        | n                         | 114                | 116              | 116              |
|                                 | Mean $\pm$ SD             | 24.7 $\pm$ 5.4     | 25.6 $\pm$ 5.6   | 27.5 $\pm$ 6.6   |
|                                 | [ $\mu$ mol/L]            |                    |                  |                  |
|                                 | Normal range <sup>1</sup> | 78.9%              | 84.5%            | 87.9%            |
| Visit 4                         | n                         | 89                 | 92               | 110              |
|                                 | Mean $\pm$ SD             | 18.9 $\pm$ 4.3     | 19.4 $\pm$ 4.4   | 18.0 $\pm$ 4.6   |
|                                 | [ $\mu$ mol/L]            |                    |                  |                  |
|                                 | Normal range <sup>1</sup> | 91.0%              | 91.3%            | 85.5%            |
| <b>Alanine aminotransferase</b> |                           |                    |                  |                  |
| Baseline                        | n                         | 115                | 116              | 116              |
|                                 | Mean $\pm$ SD [U/L]       | 26.6 $\pm$ 11.5    | 27.6 $\pm$ 12.1  | 27.1 $\pm$ 11.5  |
|                                 | Normal range <sup>2</sup> | 90.4%              | 88.8%            | 90.5%            |
| Visit 4                         | n                         | 89                 | 92               | 110              |
|                                 | Mean $\pm$ SD [U/L]       | 28.7 $\pm$ 10.6    | 29.3 $\pm$ 8.9   | 35.4 $\pm$ 13.6  |
|                                 | Normal range <sup>2</sup> | 92.1%              | 91.3%            | 70.0%            |
| <b>Hemoglobin</b>               |                           |                    |                  |                  |
| Baseline                        | n                         | 118                | 118              | 117              |
|                                 | Mean $\pm$ SD [L/L]       | 150.9 $\pm$ 18.3   | 151.0 $\pm$ 17.1 | 150.8 $\pm$ 17.6 |
|                                 | Normal range <sup>3</sup> | 19.5%              | 17.8%            | 18.8%            |
| Visit 4                         | n                         | 90                 | 92               | 110              |
|                                 | Mean $\pm$ SD [g/L]       | 118.2 $\pm$ 7.9    | 119.6 $\pm$ 7.9  | 117.1 $\pm$ 7.7  |
|                                 | Normal range <sup>3</sup> | 94.4%              | 93.5%            | 94.5%            |
| <b>Hematocrit</b>               |                           |                    |                  |                  |
| Baseline                        | n                         | 118                | 118              | 117              |

|                                |                           |                 |                 |                 |
|--------------------------------|---------------------------|-----------------|-----------------|-----------------|
|                                | Mean $\pm$ SD [L/L]       | 0.43 $\pm$ 0.05 | 0.34 $\pm$ 0.05 | 0.43 $\pm$ 0.05 |
|                                | Normal range <sup>4</sup> | 53.4%           | 54.2%           | 53.0%           |
| Visit 4                        | n                         | 90              | 92              | 110             |
|                                | Mean $\pm$ SD [g/L]       | 0.34 $\pm$ 0.02 | 0.35 $\pm$ 0.02 | 0.34 $\pm$ 0.02 |
|                                | Normal range <sup>4</sup> | 53.3%           | 63.0%           | 57.3%           |
| <b>Mean corpuscular volume</b> |                           |                 |                 |                 |
| Baseline                       | n                         | 118             | 118             | 117             |
|                                | Mean $\pm$ SD [fL]        | 96.1 $\pm$ 3.9  | 96.5 $\pm$ 4.1  | 96.0 $\pm$ 3.9  |
|                                | Normal range <sup>5</sup> | 97.5%           | 97.5%           | 98.3%           |
| Visit 4                        | n                         | 90              | 92              | 110             |
|                                | Mean $\pm$ SD [fL]        | 80.5 $\pm$ 3.8  | 81.0 $\pm$ 3.3  | 80.3 $\pm$ 3.6  |
|                                | Normal range <sup>5</sup> | 90.0%           | 91.3%           | 95.5%           |

n: number of subjects; SD: Standard deviation; normal range: <sup>1</sup>serum creatinine: <30 days: 21-75  $\mu$ mol/L, 30 days to 1 year: 15-37  $\mu$ mol/L, <sup>2</sup>alanine aminotransferase:  $\leq$ 1 year: 8-41 U/L; <sup>3</sup>haemoglobin: <30 days: 95-135 g/L, 30 days to 1 year: 105-135 g/L; <sup>4</sup>haematocrit: <30days: 0.32-0.44 L/L, 30 days to 1 year: 0.34-0.44 L/L; <sup>5</sup>mean corpuscular volume: <30 days: 86-104 fL, 30 days to 1 year: 70-86 fL
