# Supplementary material for: Suitability and safety of L-5-methyltetrahydrofolate as a folate source in infant formula: A randomized-controlled trial
Source: PubMed Central journal article supplement (PMC6699731; doi:10.1371/journal.pone.0216790), 2019-08-19
Supplement: pone.0216790.s008.pdf [file pone.0216790.s008.pdf]

**S6 Table:** Gain in body weight, recumbent length and head circumference as well as daily calorie intake per kilo body weight for the modified intention-to-treat and the per-protocol population

| <b>Weight gain per day [g/ day]</b>           |                  |                      |                           |                        |
|-----------------------------------------------|------------------|----------------------|---------------------------|------------------------|
| <b>Modified intention-to-treat population</b> |                  |                      |                           |                        |
| <b>Interval</b>                               | <b>Parameter</b> | <b>Control group</b> | <b>Intervention group</b> | <b>Reference group</b> |
| Visit 1 to 2                                  | n                | 96                   | 95                        | 114                    |
|                                               | Mean             | 39.37                | 37.13                     | 35.36                  |
|                                               | SD               | 9.68                 | 8.94                      | 9.97                   |
|                                               | SE               | 0.99                 | 0.92                      | 0.93                   |
|                                               | Median           | 37.05                | 38.52                     | 34.81                  |
|                                               | P25              | 33.37                | 30.49                     | 28.1                   |
|                                               | P75              | 44.73                | 42.96                     | 40.89                  |
|                                               | Min              | 24.11                | 8.13                      | 7.41                   |
|                                               | Max              | 83.39                | 57.14                     | 62.6                   |
| Visit 1 to 3                                  | n                | 95                   | 91                        | 112                    |
|                                               | Mean             | 34.32                | 33.5                      | 30.8                   |
|                                               | SD               | 7.06                 | 7.15                      | 8.05                   |
|                                               | SE               | 0.72                 | 0.75                      | 0.76                   |
|                                               | Median           | 33.43                | 33.75                     | 30.24                  |
|                                               | P25              | 28.93                | 27.86                     | 25.17                  |
|                                               | P75              | 39.39                | 38.87                     | 35.38                  |
|                                               | Min              | 20.63                | 17.68                     | 11.61                  |
|                                               | Max              | 55.54                | 52.77                     | 50.55                  |
| Visit 1 to 4                                  | n                | 95                   | 91                        | 112                    |
|                                               | Mean             | 31.2                 | 30.74                     | 27.68                  |
|                                               | SD               | 5.88                 | 6.07                      | 6.38                   |
|                                               | SE               | 0.6                  | 0.64                      | 0.6                    |
|                                               | Median           | 30.51                | 30.76                     | 27.63                  |

|     |       |       |       |
|-----|-------|-------|-------|
| P25 | 26.99 | 26.31 | 23.38 |
| P75 | 34.35 | 34.58 | 31.23 |
| Min | 21.53 | 15.49 | 13.96 |
| Max | 51.96 | 45.99 | 47.41 |

---

**Per-protocol population**

| <b>Interval</b> | <b>Parameter</b> | <b>Control group</b> | <b>Intervention group</b> | <b>Reference group</b> |
|-----------------|------------------|----------------------|---------------------------|------------------------|
| Visit 1 to 2    | n                | 83                   | 71                        | 90                     |
|                 | Mean             | 39.45                | 36.91                     | 35.44                  |
|                 | SD               | 9.6                  | 9.46                      | 10.24                  |
|                 | SE               | 1.05                 | 1.12                      | 1.08                   |
|                 | Median           | 37.14                | 37.4                      | 34.64                  |
|                 | P25              | 33.52                | 30.77                     | 28.1                   |
|                 | P75              | 44.29                | 41.43                     | 40.71                  |
|                 | Min              | 24.11                | 8.13                      | 7.41                   |
|                 | Max              | 83.39                | 57.14                     | 62.6                   |
| Visit 1 to 3    | n                | 82                   | 71                        | 90                     |
|                 | Mean             | 34.24                | 33.31                     | 30.81                  |
|                 | SD               | 6.89                 | 7.28                      | 8.39                   |
|                 | SE               | 0.76                 | 0.86                      | 0.88                   |
|                 | Median           | 33.47                | 33.25                     | 30.31                  |
|                 | P25              | 29.33                | 27.86                     | 25.18                  |
|                 | P75              | 38.75                | 39.2                      | 35.88                  |
|                 | Min              | 20.63                | 17.68                     | 11.61                  |
|                 | Max              | 55.54                | 52.77                     | 50.55                  |
| Visit 1 to 4    | n                | 83                   | 71                        | 90                     |
|                 | Mean             | 31.22                | 30.85                     | 27.64                  |
|                 | SD               | 5.73                 | 6.14                      | 6.7                    |
|                 | SE               | 0.63                 | 0.73                      | 0.71                   |

---

|        |       |       |       |
|--------|-------|-------|-------|
| Median | 30.62 | 30.65 | 27.63 |
| P25    | 27.18 | 26.31 | 23.15 |
| P75    | 34.05 | 34.88 | 31.27 |
| Min    | 21.53 | 19.05 | 13.96 |
| Max    | 51.96 | 45.99 | 47.41 |

---

**Recumbent length gain per day [cm/ day]**

---

**Modified intention-to-treat population**

| Interval     | Parameter | Control group | Intervention group | Reference group |
|--------------|-----------|---------------|--------------------|-----------------|
| Visit 1 to 2 | n         | 96            | 95                 | 114             |
|              | Mean      | 0.13          | 0.12               | 0.12            |
|              | SD        | 0.05          | 0.04               | 0.05            |
|              | SE        | 0             | 0                  | 0               |
|              | Median    | 0.13          | 0.13               | 0.12            |
|              | P25       | 0.1           | 0.1                | 0.09            |
|              | P75       | 0.16          | 0.15               | 0.15            |
|              | Min       | 0.02          | 0                  | 0               |
|              | Max       | 0.29          | 0.22               | 0.24            |
| Visit 1 to 3 | n         | 95            | 91                 | 112             |
|              | Mean      | 0.12          | 0.12               | 0.12            |
|              | SD        | 0.02          | 0.03               | 0.03            |
|              | SE        | 0             | 0                  | 0               |
|              | Median    | 0.12          | 0.11               | 0.12            |
|              | P25       | 0.11          | 0.1                | 0.1             |
|              | P75       | 0.13          | 0.13               | 0.13            |
|              | Min       | 0.06          | 0.05               | 0.06            |
|              | Max       | 0.17          | 0.18               | 0.25            |
| Visit 1 to 4 | n         | 95            | 91                 | 112             |
|              | Mean      | 0.11          | 0.11               | 0.11            |

|        |      |      |      |
|--------|------|------|------|
| SD     | 0.02 | 0.02 | 0.02 |
| SE     | 0.0  | 0.0  | 0.0  |
| Median | 0.11 | 0.11 | 0.11 |
| P25    | 0.1  | 0.1  | 0.09 |
| P75    | 0.12 | 0.12 | 0.12 |
| Min    | 0.07 | 0.06 | 0.05 |
| Max    | 0.16 | 0.15 | 0.16 |

---

**Per-protocol population**

| <b>Interval</b> | <b>Parameter</b> | <b>Control group</b> | <b>Intervention group</b> | <b>Reference group</b> |
|-----------------|------------------|----------------------|---------------------------|------------------------|
| Visit 1 to 2    | n                | 83                   | 71                        | 90                     |
|                 | Mean             | 0.13                 | 0.12                      | 0.12                   |
|                 | SD               | 0.05                 | 0.04                      | 0.05                   |
|                 | SE               | 0.01                 | 0.00                      | 0.01                   |
|                 | Median           | 0.13                 | 0.13                      | 0.12                   |
|                 | P25              | 0.11                 | 0.1                       | 0.09                   |
|                 | P75              | 0.16                 | 0.15                      | 0.15                   |
|                 | Min              | 0.02                 | 0.00                      | 0.01                   |
|                 | Max              | 0.29                 | 0.22                      | 0.23                   |
| Visit 1 to 3    | n                | 82                   | 71                        | 90                     |
|                 | Mean             | 0.12                 | 0.11                      | 0.12                   |
|                 | SD               | 0.02                 | 0.02                      | 0.03                   |
|                 | SE               | 0.00                 | 0.00                      | 0.00                   |
|                 | Median           | 0.12                 | 0.11                      | 0.12                   |
|                 | P25              | 0.11                 | 0.1                       | 0.1                    |
|                 | P75              | 0.13                 | 0.13                      | 0.13                   |
|                 | Min              | 0.06                 | 0.05                      | 0.07                   |
|                 | Max              | 0.17                 | 0.18                      | 0.25                   |
| Visit 1 to 4    | n                | 83                   | 71                        | 90                     |

---

|        |      |      |      |
|--------|------|------|------|
| Mean   | 0.11 | 0.11 | 0.11 |
| SD     | 0.02 | 0.02 | 0.02 |
| SE     | 0.00 | 0.00 | 0.00 |
| Median | 0.11 | 0.11 | 0.11 |
| P25    | 0.1  | 0.1  | 0.1  |
| P75    | 0.12 | 0.12 | 0.12 |
| Min    | 0.07 | 0.06 | 0.05 |
| Max    | 0.16 | 0.15 | 0.16 |

---

**Head circumference gain per day [cm/ day]**

---

**Modified intention-to-treat population**

| <b>Interval</b> | <b>Parameter</b> | <b>Control group</b> | <b>Intervention group</b> | <b>Reference group</b> |
|-----------------|------------------|----------------------|---------------------------|------------------------|
| Visit 1 to 2    | n                | 96                   | 95                        | 114                    |
|                 | Mean             | 0.07                 | 0.07                      | 0.07                   |
|                 | SD               | 0.03                 | 0.03                      | 0.03                   |
|                 | SE               | 0                    | 0                         | 0                      |
|                 | Median           | 0.07                 | 0.07                      | 0.07                   |
|                 | P25              | 0.05                 | 0.05                      | 0.05                   |
|                 | P75              | 0.09                 | 0.09                      | 0.08                   |
|                 | Min              | 0                    | 0.02                      | -0.02                  |
|                 | Max              | 0.2                  | 0.15                      | 0.14                   |
| Visit 1 to 3    | n                | 95                   | 91                        | 112                    |
|                 | Mean             | 0.06                 | 0.06                      | 0.06                   |
|                 | SD               | 0.02                 | 0.02                      | 0.01                   |
|                 | SE               | 0                    | 0                         | 0                      |
|                 | Median           | 0.06                 | 0.05                      | 0.05                   |
|                 | P25              | 0.05                 | 0.05                      | 0.05                   |
|                 | P75              | 0.07                 | 0.07                      | 0.06                   |
|                 | Min              | 0.01                 | 0.03                      | 0.02                   |

|              |        |      |      |      |
|--------------|--------|------|------|------|
|              | Max    | 0.11 | 0.11 | 0.09 |
| Visit 1 to 4 | n      | 95   | 91   | 112  |
|              | Mean   | 0.05 | 0.05 | 0.05 |
|              | SD     | 0.01 | 0.01 | 0.01 |
|              | SE     | 0    | 0    | 0    |
|              | Median | 0.05 | 0.05 | 0.05 |
|              | P25    | 0.05 | 0.05 | 0.05 |
|              | P75    | 0.06 | 0.06 | 0.06 |
|              | Min    | 0.02 | 0.03 | 0.03 |
|              | Max    | 0.09 | 0.1  | 0.08 |

---

**Per-protocol population**

| <b>Interval</b> | <b>Parameter</b> | <b>Control group</b> | <b>Intervention group</b> | <b>Reference group</b> |
|-----------------|------------------|----------------------|---------------------------|------------------------|
| Visit 1 to 2    | n                | 83                   | 71                        | 90                     |
|                 | Mean             | 0.07                 | 0.07                      | 0.07                   |
|                 | SD               | 0.03                 | 0.02                      | 0.03                   |
|                 | SE               | 0                    | 0                         | 0                      |
|                 | Median           | 0.07                 | 0.07                      | 0.07                   |
|                 | P25              | 0.05                 | 0.05                      | 0.05                   |
|                 | P75              | 0.08                 | 0.09                      | 0.08                   |
|                 | Min              | 0                    | 0.02                      | 0                      |
|                 | Max              | 0.2                  | 0.15                      | 0.14                   |
| Visit 1 to 3    | n                | 82                   | 71                        | 90                     |
|                 | Mean             | 0.06                 | 0.06                      | 0.06                   |
|                 | SD               | 0.02                 | 0.02                      | 0.01                   |
|                 | SE               | 0                    | 0                         | 0                      |
|                 | Median           | 0.06                 | 0.05                      | 0.05                   |
|                 | P25              | 0.05                 | 0.05                      | 0.05                   |
|                 | P75              | 0.07                 | 0.06                      | 0.06                   |

---

|              |        |      |      |      |
|--------------|--------|------|------|------|
| Visit 1 to 4 | Min    | 0.01 | 0.03 | 0.02 |
|              | Max    | 0.11 | 0.11 | 0.09 |
|              | n      | 83   | 71   | 90   |
|              | Mean   | 0.05 | 0.05 | 0.05 |
|              | SD     | 0.01 | 0.01 | 0.01 |
|              | SE     | 0    | 0    | 0    |
|              | Median | 0.05 | 0.05 | 0.05 |
|              | P25    | 0.05 | 0.05 | 0.05 |
|              | P75    | 0.06 | 0.06 | 0.06 |
|              | Min    | 0.02 | 0.04 | 0.03 |
| Max          | 0.09   | 0.1  | 0.08 |      |

---

**Daily calorie intake per kilo body weight [kcal/ day]**

---

**Modified intention-to-treat population**

| <b>Interval</b> | <b>Parameter</b> | <b>Control group</b> | <b>Intervention group</b> | <b>Reference group</b> |
|-----------------|------------------|----------------------|---------------------------|------------------------|
| Visit 1         | n                | 99                   | 97                        | na                     |
|                 | Mean             | 118.26               | 116.58                    | na                     |
|                 | SD               | 23.21                | 25.71                     | na                     |
|                 | SE               | 2.33                 | 2.61                      | na                     |
|                 | Median           | 120.25               | 112.45                    | na                     |
|                 | P25              | 101.35               | 99.49                     | na                     |
|                 | P75              | 132.19               | 127.01                    | na                     |
|                 | Min              | 65.4                 | 56.95                     | na                     |
|                 | Max              | 183.13               | 196.41                    | na                     |
| Visit 2         | n                | 93                   | 91                        | na                     |
|                 | Mean             | 111.08               | 111.62                    | na                     |
|                 | SD               | 19.33                | 20.25                     | na                     |
|                 | SE               | 2                    | 2.12                      | na                     |
|                 | Median           | 108.29               | 111.41                    | na                     |

|         |        |        |        |    |
|---------|--------|--------|--------|----|
|         | P25    | 97.62  | 97.33  | na |
|         | P75    | 122.18 | 124.18 | na |
|         | Min    | 64.67  | 68.59  | na |
|         | Max    | 181.99 | 177.73 | na |
| Visit 3 | n      | 93     | 88     | na |
|         | Mean   | 100    | 102.97 | na |
|         | SD     | 16.93  | 19     | na |
|         | SE     | 1.76   | 2.03   | na |
|         | Median | 97.78  | 101.3  | na |
|         | P25    | 89.08  | 90.03  | na |
|         | P75    | 108.58 | 110.69 | na |
|         | Min    | 66.93  | 62.74  | na |
|         | Max    | 167.66 | 169.45 | na |
| Visit 4 | n      | 94     | 88     | na |
|         | Mean   | 91.79  | 96.43  | na |
|         | SD     | 14.4   | 15.3   | na |
|         | SE     | 1.49   | 1.63   | na |
|         | Median | 89.64  | 94.32  | na |
|         | P25    | 82.13  | 87.62  | na |
|         | P75    | 98.85  | 103.73 | na |
|         | Min    | 65.18  | 56.58  | na |
|         | Max    | 139.7  | 140.75 | na |

**Per-protocol population**

| <b>Interval</b> | <b>Parameter</b> | <b>Control group</b> | <b>Intervention group</b> | <b>Reference group</b> |
|-----------------|------------------|----------------------|---------------------------|------------------------|
| Visit 1         | n                | 81                   | 71                        | na                     |
|                 | Mean             | 122.13               | 117.88                    | na                     |
|                 | SD               | 22.2                 | 26.25                     | na                     |
|                 | SE               | 2.47                 | 3.12                      | na                     |



|         |        |        |        |    |
|---------|--------|--------|--------|----|
|         | Median | 121.97 | 112.03 | na |
|         | P25    | 109.29 | 99.49  | na |
|         | P75    | 133.34 | 135.83 | na |
|         | Min    | 65.4   | 56.95  | na |
|         | Max    | 183.13 | 181.06 | na |
| Visit 2 | n      | 81     | 69     | na |
|         | Mean   | 112.71 | 112.67 | na |
|         | SD     | 19.23  | 18.45  | na |
|         | SE     | 2.14   | 2.22   | na |
|         | Median | 113.65 | 113.2  | na |
|         | P25    | 100.08 | 100.4  | na |
|         | P75    | 122.59 | 125.17 | na |
|         | Min    | 64.67  | 69.02  | na |
|         | Max    | 181.99 | 156.81 | na |
| Visit 3 | n      | 81     | 69     | na |
|         | Mean   | 101.5  | 103.37 | na |
|         | SD     | 16.72  | 17.43  | na |
|         | SE     | 1.86   | 2.1    | na |
|         | Median | 101.14 | 101.38 | na |
|         | P25    | 92.4   | 92.32  | na |
|         | P75    | 110.08 | 111.01 | na |
|         | Min    | 66.93  | 62.74  | na |
|         | Max    | 167.66 | 157.6  | na |
| Visit 4 | n      | 82     | 69     | na |
|         | Mean   | 92.59  | 97.11  | na |
|         | SD     | 14.81  | 14.4   | na |
|         | SE     | 1.64   | 1.73   | na |
|         | Median | 90.05  | 94.21  | na |

---

|     |       |        |    |
|-----|-------|--------|----|
| P25 | 83.48 | 87.65  | na |
| P75 | 98.88 | 103.74 | na |
| Min | 65.18 | 59.42  | na |
| Max | 139.7 | 140.75 | na |

---

Max: maximum; Min: minimum; n: number of subjects; P25: 25<sup>th</sup> percentile; P75: 75<sup>th</sup> percentile; SD: Standard deviation; SE: Standard error
