# Supplementary material for: Suitability and safety of L-5-methyltetrahydrofolate as a folate source in infant formula: A randomized-controlled trial
Source: PubMed Central journal article supplement (PMC6699731; doi:10.1371/journal.pone.0216790), 2019-08-19
Supplement: pone.0216790.s009.pdf [file pone.0216790.s009.pdf]

**S7 Table:** Fixed effects solution for the model for the gain in weight, recumbent length, head circumference and calorie intake in the modified intention-to-treat and per-protocol population

| <b>Weight gain (Primary outcome)</b>          |               |                 |           |           |                   |          |                    |                    |
|-----------------------------------------------|---------------|-----------------|-----------|-----------|-------------------|----------|--------------------|--------------------|
| <b>Modified intention-to-treat population</b> |               |                 |           |           |                   |          |                    |                    |
| <b>Parameter</b>                              |               | <b>Estimate</b> | <b>SE</b> | <b>DF</b> | <b>t</b>          | <b>p</b> | <b>95% CI</b>      |                    |
|                                               |               |                 |           |           |                   |          | <b>Lower limit</b> | <b>Upper limit</b> |
| Intercept                                     |               | -102.02         | 158.47    | 196       | -0.64             | 0.5205   | -414.53            | 210.50             |
| Group                                         | Intervention* | -26.0253        | 41.9917   | 371       | -0.62             | 0.5358   | -108.60            | 56.5463            |
| Age                                           |               | 47.7945         | 1.0173    | 189       | 46.98             | <.0001   | 45.7877            | 49.8013            |
| Age x group                                   | Intervention* | -0.3224         | 0.8701    | 371       | -0.37             | 0.7112   | -2.0333            | 1.3885             |
| Age x age                                     |               | -0.1180         | 0.005748  | 371       | -20.53            | <.0001   | -0.1293            | -0.1067            |
| Gender                                        | Male**        | 94.9163         | 35.4450   | 371       | 2.68              | 0.0077   | 25.2180            | 164.61             |
| Birth weight                                  |               | 0.8615          | 0.04439   | 371       | 19.41             | <.0001   | 0.7742             | 0.9488             |
| <b>T<sup>2</sup>Intercept</b>                 |               | 61574           | 9360.66   |           | 6.58 <sup>#</sup> | <.0001   |                    |                    |
| <b>T<sup>2</sup>Age</b>                       |               | 31.7698         | 3.6998    |           | 8.59 <sup>#</sup> | <.0001   |                    |                    |

**Per-protocol population**

| Parameter                           | Estimate      | SE       | DF       | <i>t</i> | <i>p</i>          | 95% CI      |             |         |
|-------------------------------------|---------------|----------|----------|----------|-------------------|-------------|-------------|---------|
|                                     |               |          |          |          |                   | Lower limit | Upper limit |         |
| Intercept                           | -36.6595      | 176.98   | 151      | -0.21    | 0.8362            | -386.34     | 313.02      |         |
| group                               | Intervention* | -25.8946 | 45.7137  | 305      | -0.57             | 0.5715      | -115.85     | 64.0595 |
| age                                 |               | 47.1965  | 1.1344   | 152      | 41.60             | <.0001      | 44.9553     | 49.4378 |
| age*group                           | Intervention* | -0.2161  | 0.9626   | 305      | -0.22             | 0.8225      | -2.1102     | 1.6780  |
| age*age                             |               | -0.1144  | 0.006555 | 305      | -17.45            | <.0001      | -0.1273     | -0.1015 |
| gender                              | Male**        | 50.0266  | 39.7719  | 305      | 1.26              | 0.2094      | -28.2355    | 128.29  |
| birth weight                        |               | 0.8515   | 0.04945  | 305      | 17.22             | <.0001      | 0.7542      | 0.9488  |
| T <sup>2</sup> <sub>Intercept</sub> |               | 54809    | 9651.31  |          | 5.68 <sup>#</sup> | <.0001      |             |         |
| T <sup>2</sup> <sub>Age</sub>       |               | 31.3540  | 4.0785   |          | 7.69 <sup>#</sup> | <.0001      |             |         |

**Gain in recumbent length**

**Modified intention-to-treat population**

| Parameter   | Estimate      | SE       | DF       | <i>t</i> | <i>p</i> | 95% CI      |             |          |
|-------------|---------------|----------|----------|----------|----------|-------------|-------------|----------|
|             |               |          |          |          |          | Lower limit | Upper limit |          |
| Intercept   | 41.5931       | 0.7799   | 196      | 53.33    | <.0001   | 40.0550     | 43.1312     |          |
| Ggroup      | Intervention* | 0.09410  | 0.2093   | 372      | 0.45     | 0.6532      | -0.3174     | 0.5056   |
| Age         |               | 0.1118   | 0.001738 | 189      | 64.29    | <.0001      | 0.1083      | 0.1152   |
| Age x group | Intervention* | -0.00339 | 0.002487 | 372      | -1.37    | 0.1730      | -0.00828    | 0.001495 |

|                               |        |          |          |     |                   |        |          |          |
|-------------------------------|--------|----------|----------|-----|-------------------|--------|----------|----------|
| Age x age                     |        | 0.7336   | 0.1763   | 372 | 4.16              | <.0001 | 0.3870   | 1.0803   |
| Gender                        | Male** | 0.002903 | 0.000221 | 372 | 13.15             | <.0001 | 0.002469 | 0.003337 |
| Birth weight                  |        | 41.5931  | 0.7799   | 196 | 53.33             | <.0001 | 40.0550  | 43.1312  |
| <b>T<sup>2</sup>Intercept</b> |        | 0.9987   | 0.2449   |     | 4.08 <sup>#</sup> | <.0001 |          |          |
| <b>T<sup>2</sup>Age</b>       |        | 0.000099 | 0.000033 |     | 2.98 <sup>#</sup> | 0.0015 |          |          |

---

**Per-protocol population**

---

| Parameter                     |               | Estimate | SE       | DF  | t                 | p      | 95% CI      |             |
|-------------------------------|---------------|----------|----------|-----|-------------------|--------|-------------|-------------|
|                               |               |          |          |     |                   |        | Lower limit | Upper limit |
| Intercept                     |               | 41.2100  | 0.8905   | 151 | 46.28             | <.0001 | 39.4505     | 42.9695     |
| group                         | Intervention* | 0.3135   | 0.2351   | 306 | 1.33              | 0.1834 | -0.1492     | 0.7761      |
| age                           |               | 0.1116   | 0.001807 | 152 | 61.74             | <.0001 | 0.1080      | 0.1152      |
| age*group                     | Intervention* | -0.00402 | 0.002665 | 306 | -1.51             | 0.1320 | -0.00927    | 0.001219    |
| age*age                       |               | 0.7438   | 0.2023   | 306 | 3.68              | 0.0003 | 0.3457      | 1.1419      |
| gender                        | Male**        | 0.002999 | 0.000252 | 306 | 11.92             | <.0001 | 0.002504    | 0.003494    |
| birth weight                  |               | 41.2100  | 0.8905   | 151 | 46.28             | <.0001 | 39.4505     | 42.9695     |
| <b>T<sup>2</sup>Intercept</b> |               | 0.9665   | 0.2714   |     | 3.56 <sup>#</sup> | 0.0002 |             |             |
| <b>T<sup>2</sup>Age</b>       |               | 0.000082 | 0.000035 |     | 2.37 <sup>#</sup> | 0.0090 |             |             |

---

---

**Gain in head circumference**

---

**Modified intention-to-treat population**

---

| Parameter                | Estimate      | SE       | DF       | <i>t</i> | <i>p</i> | 95% CI      |             |          |
|--------------------------|---------------|----------|----------|----------|----------|-------------|-------------|----------|
|                          |               |          |          |          |          | Lower limit | Upper limit |          |
| Intercept                | 30.9782       | 0.5265   | 196      | 58.83    | <.0001   | 29.9397     | 32.0166     |          |
| Ggroup                   | Intervention* | 0.1718   | 0.1478   | 372      | 1.16     | 0.2458      | -0.1188     | 0.4624   |
| Age                      |               | 0.05418  | 0.001159 | 189      | 46.73    | <.0001      | 0.05190     | 0.05647  |
| Age x group              | Intervention* | -0.00069 | 0.001658 | 372      | -0.41    | 0.6789      | -0.00395    | 0.002574 |
| Age x age                |               | 0.5446   | 0.1188   | 372      | 4.58     | <.0001      | 0.3109      | 0.7782   |
| Gender                   | Male**        | 0.001209 | 0.000149 | 372      | 8.13     | <.0001      | 0.000917    | 0.001502 |
| Birth weight             |               | 30.9782  | 0.5265   | 196      | 58.83    | <.0001      | 29.9397     | 32.0166  |
| T <sup>2</sup> Intercept |               | 0.5773   | 0.1194   |          | 4.84#    | <.0001      |             |          |
| T <sup>2</sup> Age       |               | 0.000047 | 0.000015 |          | 3.13#    | 0.0009      |             |          |

---

**Per-protocol population**

---

| Parameter | Estimate      | SE       | DF       | <i>t</i> | <i>p</i> | 95% CI      |             |          |
|-----------|---------------|----------|----------|----------|----------|-------------|-------------|----------|
|           |               |          |          |          |          | Lower limit | Upper limit |          |
| Intercept | 30.8458       | 0.5717   | 151      | 53.95    | <.0001   | 29.7162     | 31.9754     |          |
| group     | Intervention* | 0.1887   | 0.1630   | 306      | 1.16     | 0.2479      | -0.1321     | 0.5095   |
| age       |               | 0.05333  | 0.001223 | 152      | 43.59    | <.0001      | 0.05091     | 0.05575  |
| age*group | Intervention* | -0.00023 | 0.001804 | 306      | -0.13    | 0.8984      | -0.00378    | 0.003319 |

|                          |        |          |          |     |       |        |          |          |
|--------------------------|--------|----------|----------|-----|-------|--------|----------|----------|
| age*age                  |        | 0.5572   | 0.1295   | 306 | 4.30  | <.0001 | 0.3024   | 0.8120   |
| gender                   | Male** | 0.001246 | 0.000161 | 306 | 7.74  | <.0001 | 0.000929 | 0.001563 |
| birth weight             |        | 30.8458  | 0.5717   | 151 | 53.95 | <.0001 | 29.7162  | 31.9754  |
| T <sup>2</sup> Intercept |        | 0.5477   | 0.1247   |     | 4.39# | <.0001 |          |          |
| T <sup>2</sup> Age       |        | 0.000047 | 0.000016 |     | 3.01# | 0.0013 |          |          |

---

**Increase in calorie intake**

---

**Modified intention-to-treat population**

| Parameter                |               | Estimate | SE      | DF  | t     | p      | 95% CI      |             |
|--------------------------|---------------|----------|---------|-----|-------|--------|-------------|-------------|
|                          |               |          |         |     |       |        | Lower limit | Upper limit |
| Intercept                |               | 479.45   | 47.5774 | 194 | 10.08 | <.0001 | 385.62      | 573.29      |
| Ggroup                   | Intervention* | -32.3493 | 17.4380 | 358 | -1.86 | 0.0644 | -66.6431    | 1.9445      |
| Age                      |               | 1.4235   | 0.1494  | 185 | 9.53  | <.0001 | 1.1288      | 1.7182      |
| Age x group              | Intervention* | 0.4788   | 0.2138  | 358 | 2.24  | 0.0257 | 0.05837     | 0.8993      |
| Age x age                |               | -48.0932 | 10.3980 | 358 | -4.63 | <.0001 | -68.5421    | -27.6443    |
| Gender                   | Male**        | 0.005214 | 0.01294 | 358 | 0.40  | 0.6872 | -0.02023    | 0.03066     |
| Birth weight             |               | 30.9782  | 0.5265  | 196 | 58.83 | <.0001 | 29.9397     | 32.0166     |
| T <sup>2</sup> Intercept |               | 7902.68  | 1609.62 |     | 4.91# | <.0001 |             |             |
| T <sup>2</sup> Age       |               | 1.0092   | 0.2423  |     | 4.17# | <.0001 |             |             |

---

Per-protocol population

| Parameter                |               | Estimate | SE      | DF  | t                 | p      | 95% CI      |             |
|--------------------------|---------------|----------|---------|-----|-------------------|--------|-------------|-------------|
|                          |               |          |         |     |                   |        | Lower limit | Upper limit |
| Intercept                |               | 478.77   | 49.1662 | 149 | 9.74              | <.0001 | 381.62      | 575.93      |
| group                    | Intervention* | -44.4813 | 19.4842 | 298 | -2.28             | 0.0231 | -82.8253    | -6.1372     |
| age                      |               | 1.3185   | 0.1618  | 150 | 8.15              | <.0001 | 0.9989      | 1.6382      |
| age*group                | Intervention* | 0.5745   | 0.2383  | 298 | 2.41              | 0.0165 | 0.1055      | 1.0434      |
| age*age                  |               | -44.8800 | 10.8439 | 298 | -4.14             | <.0001 | -66.2203    | -23.5398    |
| gender                   | Male**        | 0.009624 | 0.01344 | 298 | 0.72              | 0.4744 | -0.01682    | 0.03607     |
| birth weight             |               | 478.77   | 49.1662 | 149 | 9.74              | <.0001 | 381.62      | 575.93      |
| T <sup>2</sup> Intercept |               | 7509.68  | 1754.22 |     | 4.28 <sup>#</sup> | <.0001 |             |             |
| T <sup>2</sup> Age       |               | 1.0020   | 0.2654  |     | 3.78 <sup>#</sup> | <.0001 |             |             |

95% CI: Confidence interval; DF: Degree of freedom; SE: Standard error; \* Control is the reference category; \*\* Female is the reference category; # z value
