# Supplementary material for: Suitability and safety of L-5-methyltetrahydrofolate as a folate source in infant formula: A randomized-controlled trial
Source: PubMed Central journal article supplement (PMC6699731; doi:10.1371/journal.pone.0216790), 2019-08-19
Supplement: pone.0216790.s010.pdf [file pone.0216790.s010.pdf]

**S8 Table:** Least square means for body weight, recumbent length, head circumference and calorie intake at visit 4 for the modified intention-to-treat and the per protocol population

| <b>Body weight</b>                            |            |                  |          |         |     |          |          |             |             |
|-----------------------------------------------|------------|------------------|----------|---------|-----|----------|----------|-------------|-------------|
| <b>Modified intention-to-treat population</b> |            |                  |          |         |     |          |          |             |             |
| Parameter                                     | Age [days] | Birth weight [g] | Estimate | SE      | DF  | <i>t</i> | <i>p</i> | 95% CI      |             |
|                                               |            |                  |          |         |     |          |          | Lower limit | Upper limit |
| Intervention                                  | 112        | 3448.6           | 6727.03  | 58.8608 | 371 | 114.29   | <.0001   | 6611.29     | 6842.77     |
| Control                                       | 112        | 3448.6           | 6789.16  | 58.0967 | 371 | 116.86   | <.0001   | 6674.92     | 6903.40     |
| Intervention - Control                        | 112        | 3448.6           | -62.13   | 82.5163 | 371 | -0.75    | 0.4520   | -224.39     | 100.13      |
| <b>Per-protocol population</b>                |            |                  |          |         |     |          |          |             |             |
| Parameter                                     | Age [days] | Birth weight [g] | Estimate | SE      | DF  | <i>t</i> | <i>p</i> | 95% CI      |             |
|                                               |            |                  |          |         |     |          |          | Lower limit | Upper limit |
| Intervention                                  | 112        | 3448.6           | 6717.90  | 69.2637 | 305 | 96.99    | <.0001   | 6581.60     | 6854.19     |
| Control                                       | 112        | 3448.6           | 6767.99  | 64.0847 | 305 | 105.61   | <.0001   | 6641.89     | 6894.10     |
| Intervention - Control                        | 112        | 3448.6           | -50.0934 | 94.1236 | 305 | -0.53    | 0.5950   | -235.31     | 135.12      |
| <b>Recumbent length</b>                       |            |                  |          |         |     |          |          |             |             |
| <b>Modified intention-to-treat population</b> |            |                  |          |         |     |          |          |             |             |
| Parameter                                     | Age [days] | Birth weight [g] | Estimate | SE      | DF  | <i>t</i> | <i>p</i> | 95% CI      |             |
|                                               |            |                  |          |         |     |          |          | Lower limit | Upper limit |

|                        |     |        |         |        |     |        |        |         |         |
|------------------------|-----|--------|---------|--------|-----|--------|--------|---------|---------|
| Intervention           | 112 | 3448.6 | 64.2020 | 0.1713 | 372 | 374.82 | <.0001 | 63.8652 | 64.5388 |
| Control                | 112 | 3448.6 | 64.4881 | 0.1683 | 372 | 383.15 | <.0001 | 64.1572 | 64.8191 |
| Intervention - Control | 112 | 3448.6 | -0.2861 | 0.2401 | 372 | -1.19  | 0.2341 | -0.7582 | 0.1860  |

**Per-protocol population**

| Parameter              | Age [days] | Birth weight [g] | Estimate | SE     | DF  | <i>t</i> | <i>p</i> | 95% CI      |             |
|------------------------|------------|------------------|----------|--------|-----|----------|----------|-------------|-------------|
|                        |            |                  |          |        |     |          |          | Lower limit | Upper limit |
| Intervention           | 112        | 3439.0           | 64.2569  | 0.1983 | 306 | 324.02   | <.0001   | 63.8667     | 64.6471     |
| Control                | 112        | 3439.0           | 64.3942  | 0.1834 | 306 | 351.08   | <.0001   | 64.0333     | 64.7551     |
| Intervention - Control | 112        | 3439.0           | -0.1373  | 0.2700 | 306 | -0.51    | 0.6115   | -0.1373     | 0.2700      |

**Head circumference**

**Modified intention-to-treat population**

| Parameter              | Age [days] | Birth weight [g] | Estimate | SE     | DF  | <i>t</i> | <i>p</i> | 95% CI      |             |
|------------------------|------------|------------------|----------|--------|-----|----------|----------|-------------|-------------|
|                        |            |                  |          |        |     |          |          | Lower limit | Upper limit |
| Intervention           | 112        | 3448.6           | 41.5843  | 0.1090 | 372 | 381.37   | <.0001   | 41.3699     | 41.7988     |
| Control                | 112        | 3448.6           | 41.4895  | 0.1070 | 372 | 387.58   | <.0001   | 41.2790     | 41.7000     |
| Intervention - Control | 112        | 3448.6           | 0.09484  | 0.1527 | 372 | 0.62     | 0.5350   | -0.2055     | 0.3952      |

**Per-protocol population**

| Parameter | Age [days] | Birth weight [g] | Estimate | SE | DF | <i>t</i> | <i>p</i> | 95% CI      |             |
|-----------|------------|------------------|----------|----|----|----------|----------|-------------|-------------|
|           |            |                  |          |    |    |          |          | Lower limit | Upper limit |

|                        |     |        |         |        |     |        |        |         |         |
|------------------------|-----|--------|---------|--------|-----|--------|--------|---------|---------|
| Intervention           | 112 | 3439.0 | 41.5454 | 0.1216 | 306 | 341.75 | <.0001 | 41.3062 | 41.7846 |
| Control                | 112 | 3439.0 | 41.3825 | 0.1124 | 306 | 368.06 | <.0001 | 41.1612 | 41.6037 |
| Intervention - Control | 112 | 3439.0 | 0.1629  | 0.1655 | 306 | 0.98   | 0.3258 | -0.1628 | 0.4886  |

**Calorie intake**

**Modified intention-to-treat population**

| Parameter              | Age [days] | Birth weight [g] | Estimate | SE      | DF  | <i>t</i> | <i>p</i> | 95% CI      |             |
|------------------------|------------|------------------|----------|---------|-----|----------|----------|-------------|-------------|
|                        |            |                  |          |         |     |          |          | Lower limit | Upper limit |
| Intervention           | 28         | 3448.6           | 494.30   | 9.3310  | 358 | 52.97    | <.0001   | 475.95      | 512.65      |
| Control                | 28         | 3448.6           | 513.24   | 9.1923  | 358 | 55.83    | <.0001   | 495.17      | 531.32      |
| Intervention - Control | 28         | 3448.6           | -18.9424 | 13.1052 | 358 | -1.45    | 0.1492   | -44.7153    | 6.8305      |
| Intervention           | 56         | 3448.6           | 547.57   | 7.5074  | 358 | 72.94    | <.0001   | 532.80      | 562.33      |
| Control                | 56         | 3448.6           | 553.10   | 7.3906  | 358 | 74.84    | <.0001   | 538.57      | 567.64      |
| Intervention - Control | 56         | 3448.6           | -5.5354  | 10.5394 | 358 | -0.53    | 0.5998   | -26.2624    | 15.1915     |
| Intervention           | 84         | 3448.6           | 600.83   | 7.8957  | 358 | 76.10    | <.0001   | 585.30      | 616.36      |
| Control                | 84         | 3448.6           | 592.96   | 7.7285  | 358 | 76.72    | <.0001   | 577.76      | 608.16      |
| Intervention - Control | 84         | 3448.6           | 7.8715   | 11.0490 | 358 | 0.71     | 0.4767   | -13.8576    | 29.6006     |
| Intervention           | 112        | 3448.6           | 654.09   | 10.2475 | 358 | 63.83    | <.0001   | 633.94      | 674.25      |
| Control                | 112        | 3448.6           | 632.81   | 9.9912  | 358 | 63.34    | <.0001   | 613.17      | 652.46      |
| Intervention - Control | 112        | 3448.6           | 21.2784  | 14.3091 | 358 | 1.49     | 0.1379   | -6.8621     | 49.4189     |

**Per-protocol population**

| Parameter              | Age [days] | Birth weight [g] | Estimate | SE      | DF  | <i>t</i> | <i>p</i> | 95% CI      |             |
|------------------------|------------|------------------|----------|---------|-----|----------|----------|-------------|-------------|
|                        |            |                  |          |         |     |          |          | Lower limit | Upper limit |
| Intervention           | 28         | 3439.0           | 497.95   | 10.5694 | 298 | 47.11    | <.0001   | 477.15      | 518.75      |
| Control                | 28         | 3439.0           | 526.35   | 9.8257  | 298 | 53.57    | <.0001   | 507.01      | 545.69      |
| Intervention - Control | 28         | 3439.0           | -28.3963 | 14.4333 | 298 | -1.97    | 0.0501   | -56.8005    | 0.007772    |
| Intervention           | 56         | 3439.0           | 550.96   | 8.2270  | 298 | 66.97    | <.0001   | 534.77      | 567.15      |
| Control                | 56         | 3439.0           | 563.27   | 7.6341  | 298 | 73.78    | <.0001   | 548.24      | 578.29      |
| Intervention - Control | 56         | 3439.0           | -12.3114 | 11.2263 | 298 | -1.10    | 0.2737   | -34.4044    | 9.7816      |
| Intervention           | 84         | 3439.0           | 603.96   | 8.4640  | 298 | 71.36    | <.0001   | 587.30      | 620.62      |
| Control                | 84         | 3439.0           | 600.19   | 7.8136  | 298 | 76.81    | <.0001   | 584.81      | 615.56      |
| Intervention - Control | 84         | 3439.0           | 3.7735   | 11.5224 | 298 | 0.33     | 0.7435   | -18.9020    | 26.4491     |
| Intervention           | 112        | 3439.0           | 656.96   | 11.1166 | 298 | 59.10    | <.0001   | 635.09      | 678.84      |
| Control                | 112        | 3439.0           | 637.10   | 10.2403 | 298 | 62.22    | <.0001   | 616.95      | 657.26      |
| Intervention - Control | 112        | 3439.0           | 19.8585  | 15.1170 | 298 | 1.31     | 0.1900   | -9.8912     | 49.6081     |

95% CI: Confidence interval; DF: Degree of freedom; SE: Standard error
