# Supplementary material for: Suitability and safety of L-5-methyltetrahydrofolate as a folate source in infant formula: A randomized-controlled trial
Source: PubMed Central journal article supplement (PMC6699731; doi:10.1371/journal.pone.0216790), 2019-08-19
Supplement: pone.0216790.s011.pdf [file pone.0216790.s011.pdf]

**S9 Table:** Least square means for body weight at visit 4 according to treatment-gender and -genotype interaction model for the modified intention-to-treat and the per protocol population

| <b>Body weight according to treatment-gender interaction model</b> |            |                  |          |         |     |          |          |             |             |
|--------------------------------------------------------------------|------------|------------------|----------|---------|-----|----------|----------|-------------|-------------|
| <b>Modified intention-to-treat population</b>                      |            |                  |          |         |     |          |          |             |             |
| Parameter                                                          | Age [days] | Birth weight [g] | Estimate | SE      | DF  | <i>t</i> | <i>p</i> | 95% CI      |             |
|                                                                    |            |                  |          |         |     |          |          | Lower limit | Upper limit |
| Intervention                                                       | 112        | 3448.6           | 6691.96  | 56.8628 | 371 | 117.69   | <.0001   | 6580.15     | 6803.78     |
| Control                                                            | 112        | 3448.6           | 6776.19  | 55.5929 | 371 | 121.89   | <.0001   | 6666.87     | 6885.51     |
| Intervention - Control                                             | 112        | 3448.6           | -84.2263 | 79.3589 | 371 | -1.06    | 0.2892   | -240.28     | 71.8233     |
| <b>Per-protocol population</b>                                     |            |                  |          |         |     |          |          |             |             |
| Parameter                                                          | Age [days] | Birth weight [g] | Estimate | SE      | DF  | <i>t</i> | <i>p</i> | 95% CI      |             |
|                                                                    |            |                  |          |         |     |          |          | Lower limit | Upper limit |
| Intervention                                                       | 112        | 3439.0           | 6682.33  | 65.1069 | 306 | 102.64   | <.0001   | 6554.22     | 6810.45     |
| Control                                                            | 112        | 3439.0           | 6752.41  | 60.1220 | 306 | 112.31   | <.0001   | 6634.11     | 6870.72     |

|                        |     |        |          |         |     |       |        |         |        |
|------------------------|-----|--------|----------|---------|-----|-------|--------|---------|--------|
| Intervention - Control | 112 | 3439.0 | -70.0824 | 88.4235 | 306 | -0.79 | 0.4286 | -244.08 | 103.91 |
|------------------------|-----|--------|----------|---------|-----|-------|--------|---------|--------|

**Body weight according to treatment-genotype (C677T) interaction model**

**Modified intention-to-treat population**

| Parameter              | Age [days] | Birth weight [g] | Estimate | SE      | DF  | <i>t</i> | <i>p</i> | 95% CI      |             |
|------------------------|------------|------------------|----------|---------|-----|----------|----------|-------------|-------------|
|                        |            |                  |          |         |     |          |          | Lower limit | Upper limit |
| Intervention           | 112        | 3449.3           | 6698.11  | 74.8298 | 360 | 89.51    | <.0001   | 6550.95     | 6845.27     |
| Control                | 112        | 3449.3           | 6736.65  | 82.3551 | 360 | 81.80    | <.0001   | 6574.69     | 6898.61     |
| Intervention - Control | 112        | 3449.3           | -38.5358 | 111.07  | 360 | -0.35    | 0.7288   | -256.96     | 179.89      |

**Per-protocol population**

| Parameter    | Age [days] | Birth weight [g] | Estimate | SE      | DF  | <i>t</i> | <i>p</i> | 95% CI      |             |
|--------------|------------|------------------|----------|---------|-----|----------|----------|-------------|-------------|
|              |            |                  |          |         |     |          |          | Lower limit | Upper limit |
| Intervention | 112        | 3435.7           | 6679.94  | 84.5427 | 298 | 79.01    | <.0001   | 6513.56     | 6846.31     |
| Control      | 112        | 3435.7           | 6726.22  | 84.9905 | 298 | 79.14    | <.0001   | 6558.96     | 6893.48     |

|                        |     |        |          |        |     |       |        |         |        |
|------------------------|-----|--------|----------|--------|-----|-------|--------|---------|--------|
| Intervention - Control | 112 | 3435.7 | -46.2821 | 119.64 | 298 | -0.39 | 0.6992 | -281.73 | 189.17 |
|------------------------|-----|--------|----------|--------|-----|-------|--------|---------|--------|

**Body weight according to treatment-genotype (A1289C) interaction model**

**Modified intention-to-treat population**

| Parameter              | Age [days] | Birth weight [g] | Estimate | SE      | DF  | <i>t</i> | <i>p</i> | 95% CI      |             |
|------------------------|------------|------------------|----------|---------|-----|----------|----------|-------------|-------------|
|                        |            |                  |          |         |     |          |          | Lower limit | Upper limit |
| Intervention           | 112        | 3449.3           | 6742.42  | 67.4710 | 360 | 99.93    | <.0001   | 6609.74     | 6875.11     |
| Control                | 112        | 3449.3           | 6917.19  | 96.6451 | 360 | 71.57    | <.0001   | 6727.13     | 7107.25     |
| Intervention - Control | 112        | 3449.3           | -174.77  | 117.64  | 360 | -1.49    | 0.1383   | -406.12     | 56.5823     |

**Per-protocol population**

| Parameter    | Age [days] | Birth weight [g] | Estimate | SE      | DF  | <i>t</i> | <i>p</i> | 95% CI      |             |
|--------------|------------|------------------|----------|---------|-----|----------|----------|-------------|-------------|
|              |            |                  |          |         |     |          |          | Lower limit | Upper limit |
| Intervention | 112        | 3435.7           | 6717.13  | 75.3604 | 298 | 89.13    | <.0001   | 6568.82     | 6865.44     |
| Control      | 112        | 3435.7           | 6899.66  | 98.9184 | 298 | 69.75    | <.0001   | 6704.99     | 7094.32     |

---

|                        |     |        |         |        |     |       |        |         |         |
|------------------------|-----|--------|---------|--------|-----|-------|--------|---------|---------|
| Intervention - Control | 112 | 3435.7 | -182.53 | 124.08 | 298 | -1.47 | 0.1423 | -426.71 | 61.6551 |
|------------------------|-----|--------|---------|--------|-----|-------|--------|---------|---------|

---

95% CI: Confidence interval; DF: Degree of freedom; SE: Standard error
